# Supplementary material for: Brain activity regulates loose coupling between mitochondrial and cytosolic Ca2+ transients
Source: PubMed Central journal article supplement (PMC6872662; doi:10.1038/s41467-019-13142-0), 2019-11-21
Supplement: 41467_2019_13142_MOESM1_ESM.pdf [file 41467_2019_13142_MOESM1_ESM.pdf]

**Nature Communications**

Supplementary information

**Brain Activity Regulates Loose Coupling between  
Mitochondrial and Cytosolic Ca<sup>2+</sup> Transients**

Yuan Lin *et.al*

**This PDF file includes:  
Supplementary figure 1-8**

## Supplementary figure 1

a

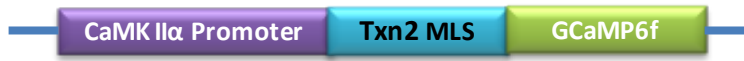

b

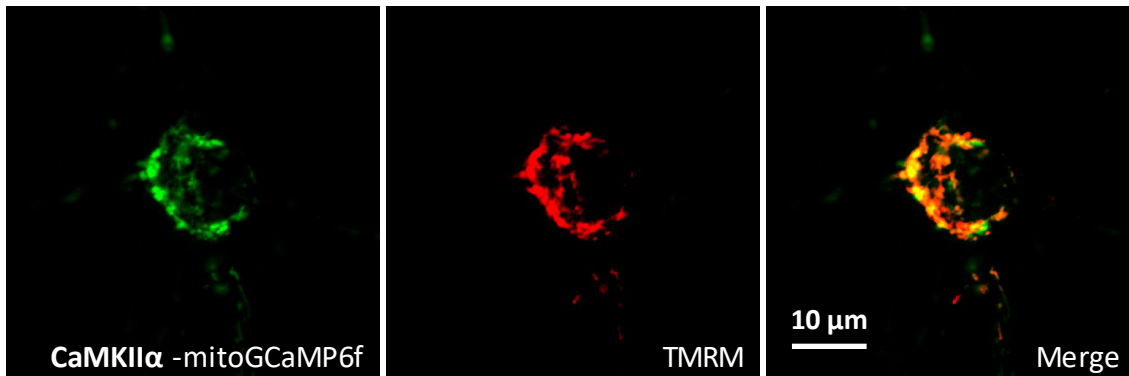

c

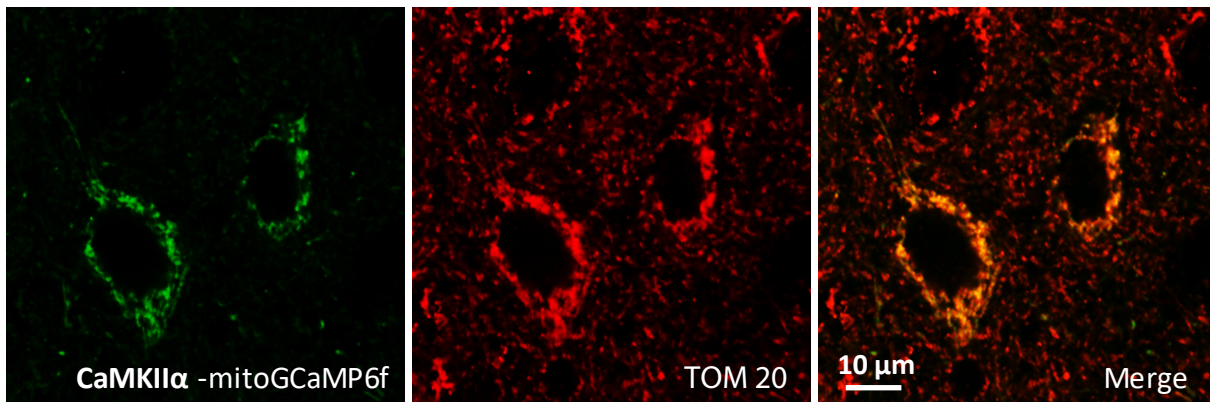

### Supplementary Figure 1. Mitochondrial targeting of GCaMP6f in neurons.

**a** Schematic of the viral construct. Purple box:  $\text{Ca}^{2+}$ /calmodulin-dependent protein kinase type II subunit alpha (CaMK II $\alpha$ ) promoter. Blue box: Mitochondrial targeting sequences of thioredoxin 2 gene. Green box: genetically encoded  $\text{Ca}^{2+}$  indicator GCaMP6f. **b**

Representative confocal images of TMRM and mito-GCaMP6f staining of cultured neonatal mouse cortical neurons. **c** Immunohistochemical staining showing co-localization of mitochondrial GCaMP6f and mitochondrial outer-membrane marker TOM20 in brain slice.

## Supplementary figure 2

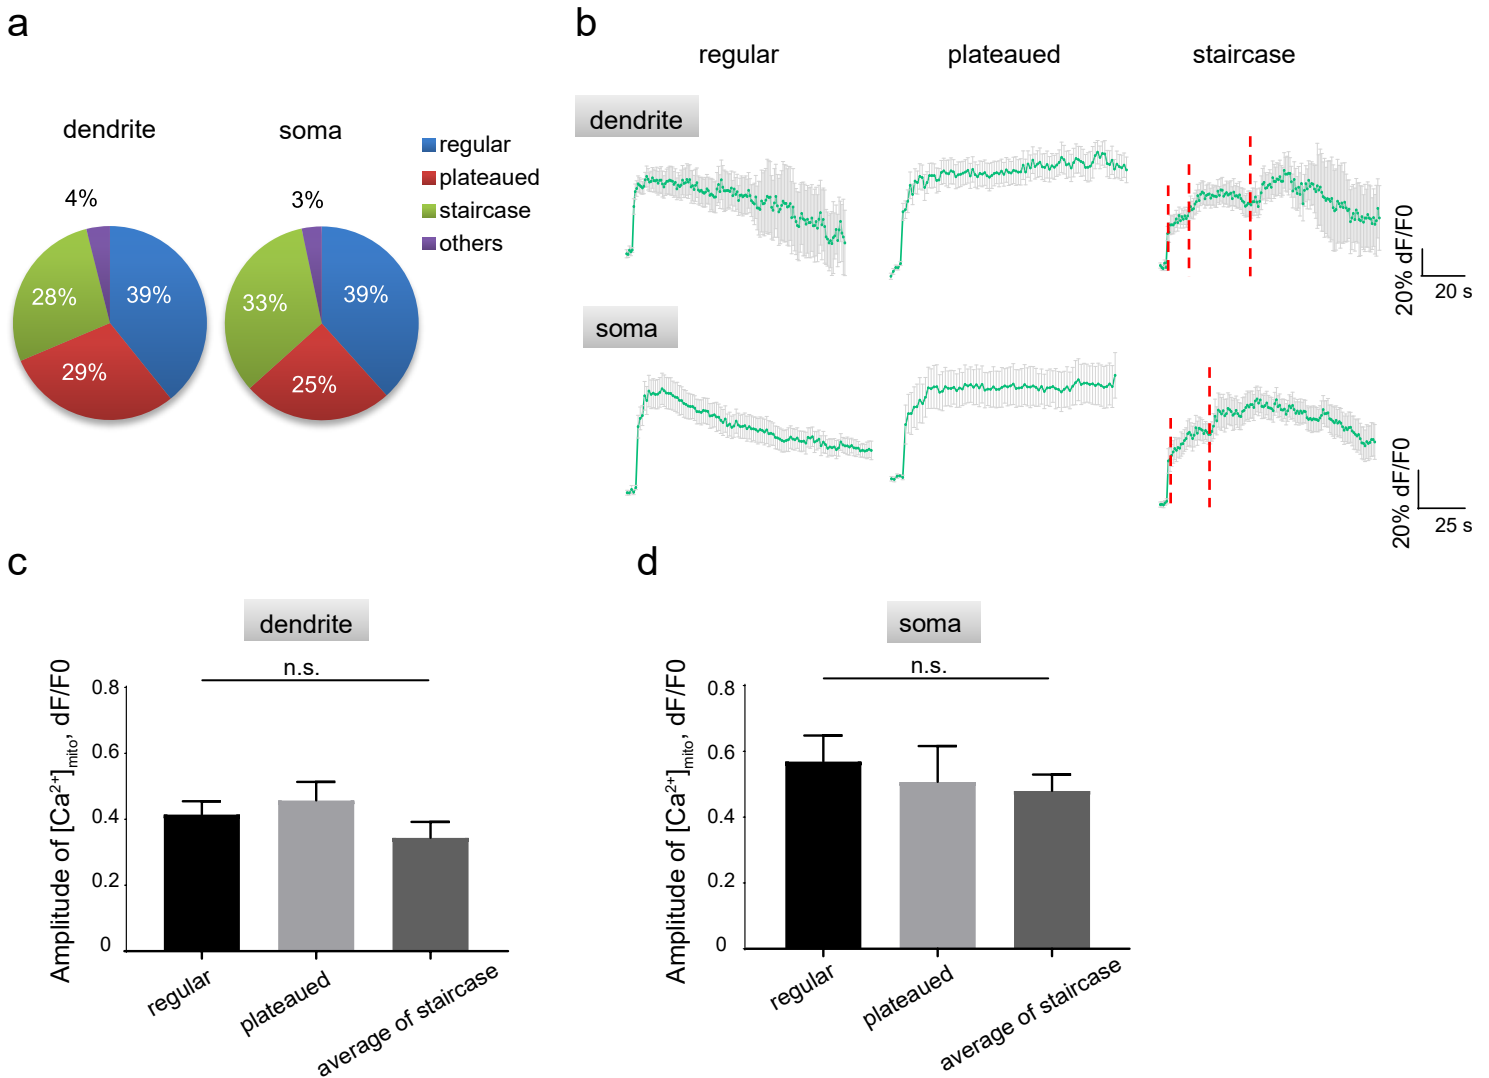

### Supplementary figure 2. Three types of $[Ca^{2+}]_{mito}$ transients.

**a** Percent of three main types of  $[Ca^{2+}]_{mito}$  transients for data obtained during treadmill running in dendrites (left,  $n = 50$  events from 6 mice) and somas (right,  $n = 64$  events from 9 mice). **b** Averaged  $[Ca^{2+}]_{mito}$  transients for the regular, staircase, and plateaued types in dendrites (upper panel) and somas (lower panel) during running. 12-16 traces used for each group. **c-d** Amplitudes of different types of  $[Ca^{2+}]_{mito}$  transients in dendrites (c,  $n = 12-16$  for each group) and somas (d,  $n = 11-15$  for each group). Data are presented as mean  $\pm$  SEM. \* $P < 0.05$ . \*\* $P < 0.01$ . \*\*\* $P < 0.0001$ , one way ANOVA and multiple comparisons. Source data are provided as a Source Data file.

## Supplementary figure 3

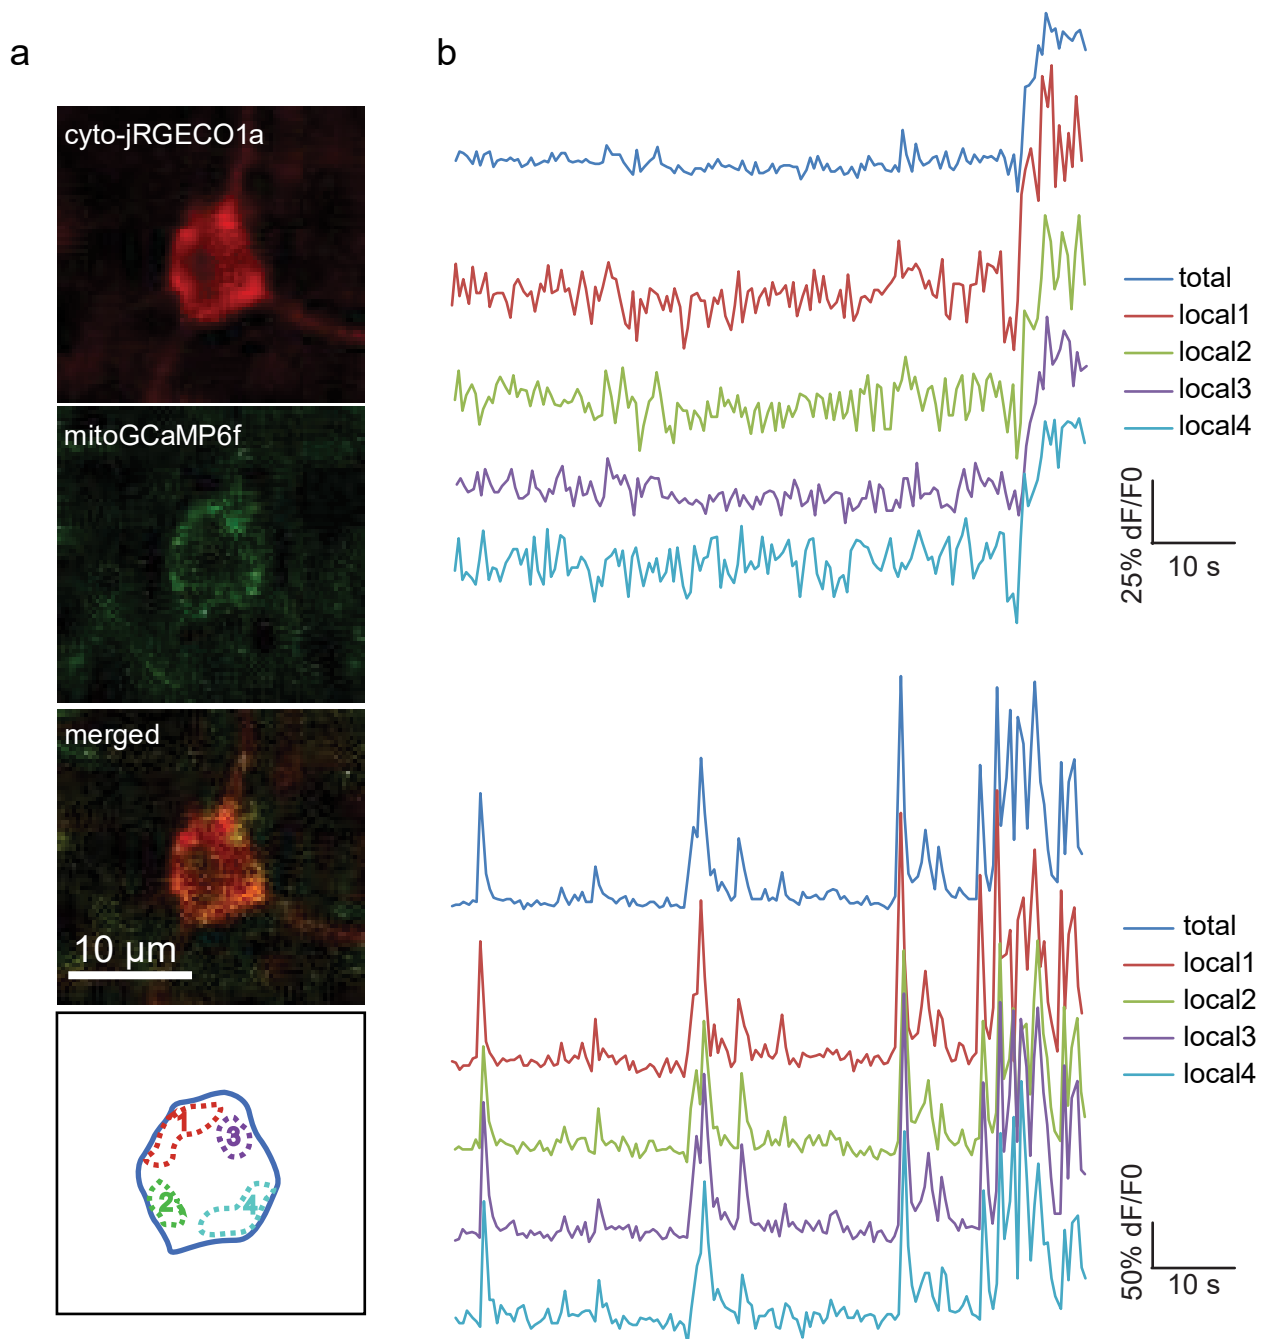

**Supplementary Figure 3.** An example showing spatially synchronized  $[Ca^{2+}]_{cyto}$  and  $[Ca^{2+}]_{mito}$  transients at different locations in a soma.

**a** Representative images of double labeling in a soma and the corresponding schematic of different regions of interest. **b** Time courses of fluorescence changes of  $[Ca^{2+}]_{mito}$  (upper) and  $[Ca^{2+}]_{cyto}$  (lower) activities at different locations as shown in the schematic on the left panel.

## Supplementary figure 4

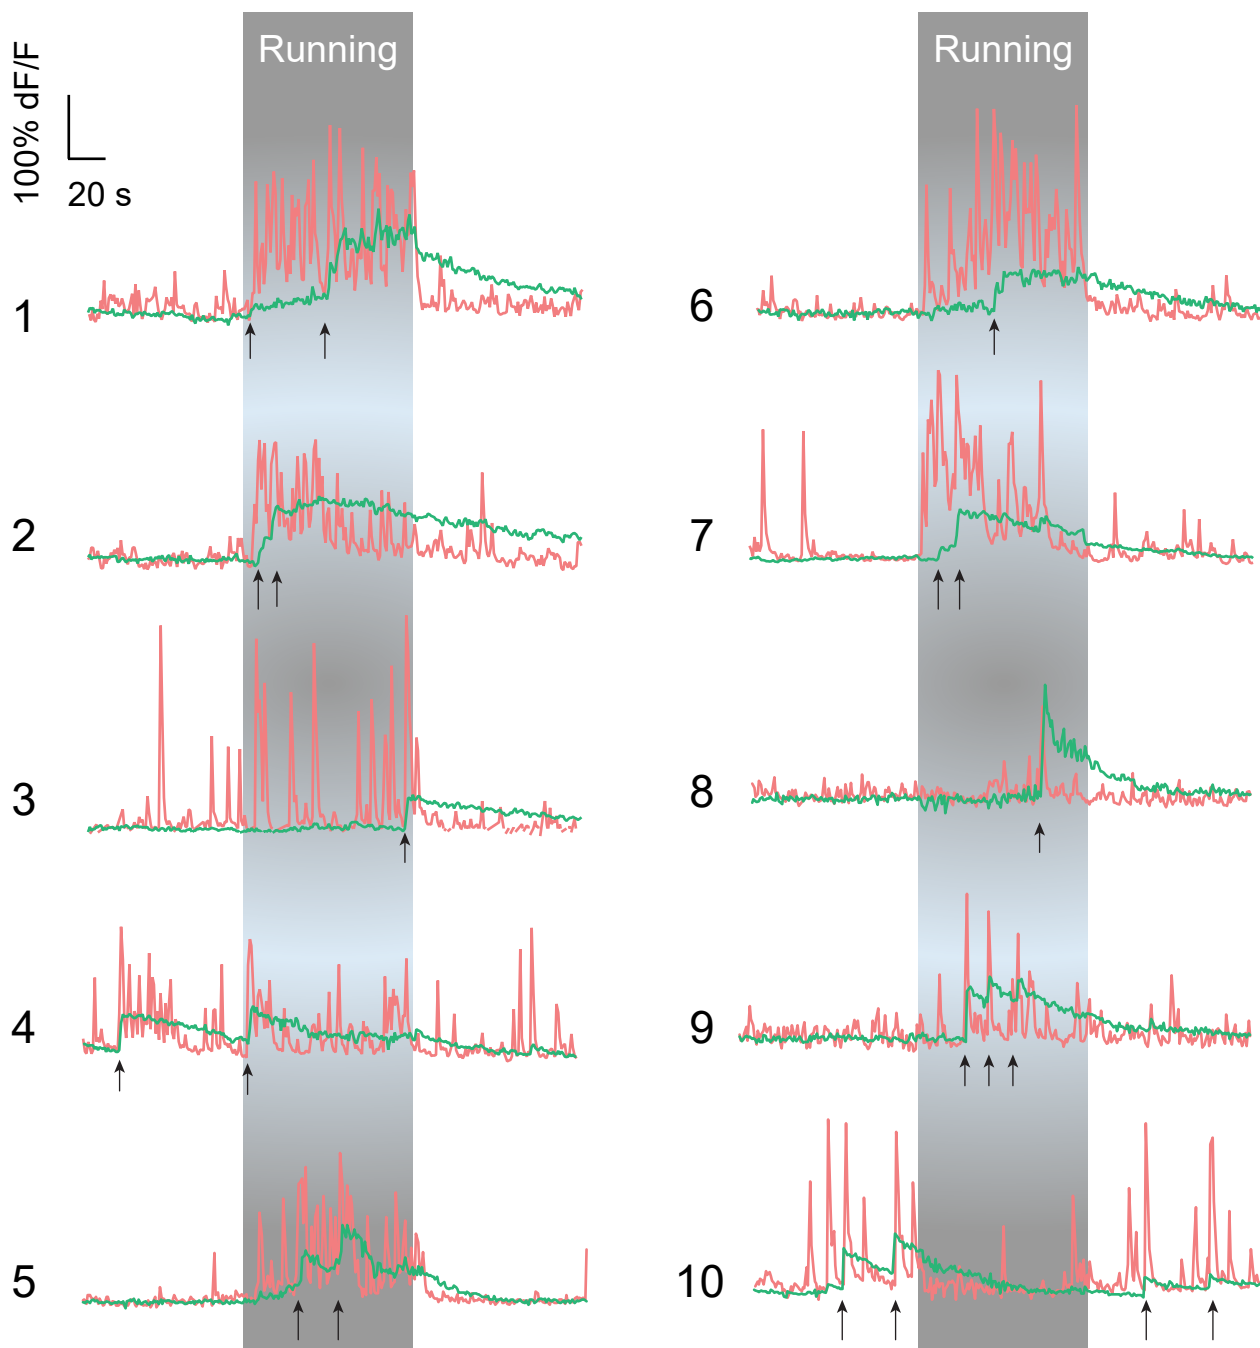

**Supplementary figure 4.** Patterns of  $[Ca^{2+}]_{mito}$ -to- $[Ca^{2+}]_{cyto}$  coupling and uncoupling in somas of M1 neurons before, during and after running.

Note the complex kinetics or “computation” for a  $[Ca^{2+}]_{cyto}$  transient (in red color) to trigger (or not to trigger) a  $[Ca^{2+}]_{mito}$  transient (in green color). Note the sharp rises of  $[Ca^{2+}]_{mito}$  transients (marked with arrows) and the variable latencies of the  $[Ca^{2+}]_{mito}$ -to- $[Ca^{2+}]_{cyto}$  coupling .

## Supplementary figure 5

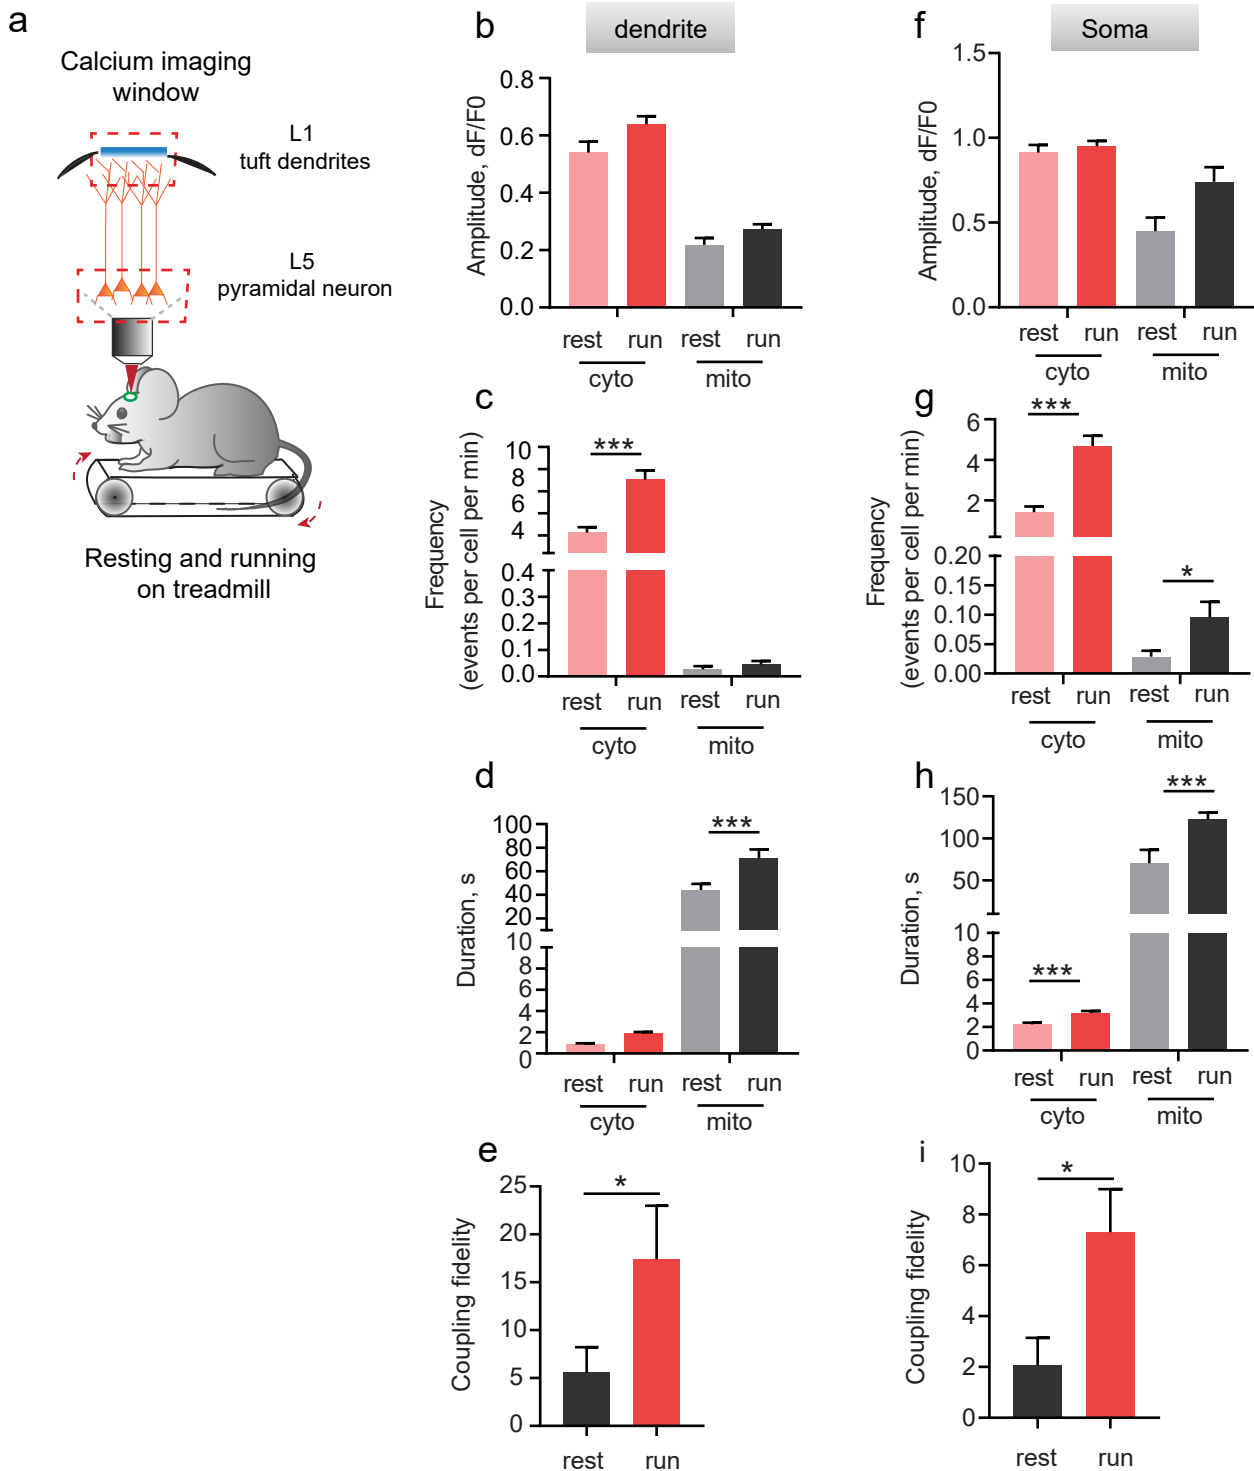

**Supplementary figure 5.** Exercise enhanced  $[Ca^{2+}]_{mito}$ -to- $[Ca^{2+}]_{cyto}$  coupling in L5 neurons in the forelimb motor cortex.

**a** Schematic of transcranial two-photon imaging in L5 pyramidal neurons ( $\sim 500 \mu m$  deep from pial surface) and their projected dendrites in L1 in the forelimb motor cortex of awake, head-restrained mice. **b-d** Amplitudes, frequencies and duration of  $[Ca^{2+}]_{cyto}$  and  $[Ca^{2+}]_{mito}$  transients in dendrites ( $n = 7-100$  from 4 mice). **h-g** Amplitudes, frequencies and duration of  $[Ca^{2+}]_{cyto}$  and  $[Ca^{2+}]_{mito}$  transients somas ( $n = 5-256$  from 4 mice) at rest and during treadmill running. **e and i**, Coupling fidelity at rest and during running in dendrites (**e**,  $n = 17-27$  events from 4 mice) and somas (**i**,  $n = 30-34$  events from 4 mice). Data are presented as mean  $\pm$  SEM. \* $P < 0.05$ . \*\* $P < 0.01$ . \*\*\* $P < 0.0001$ , unpaired T test. Source data are provided as a Source Data file.

## Supplementary figure 6

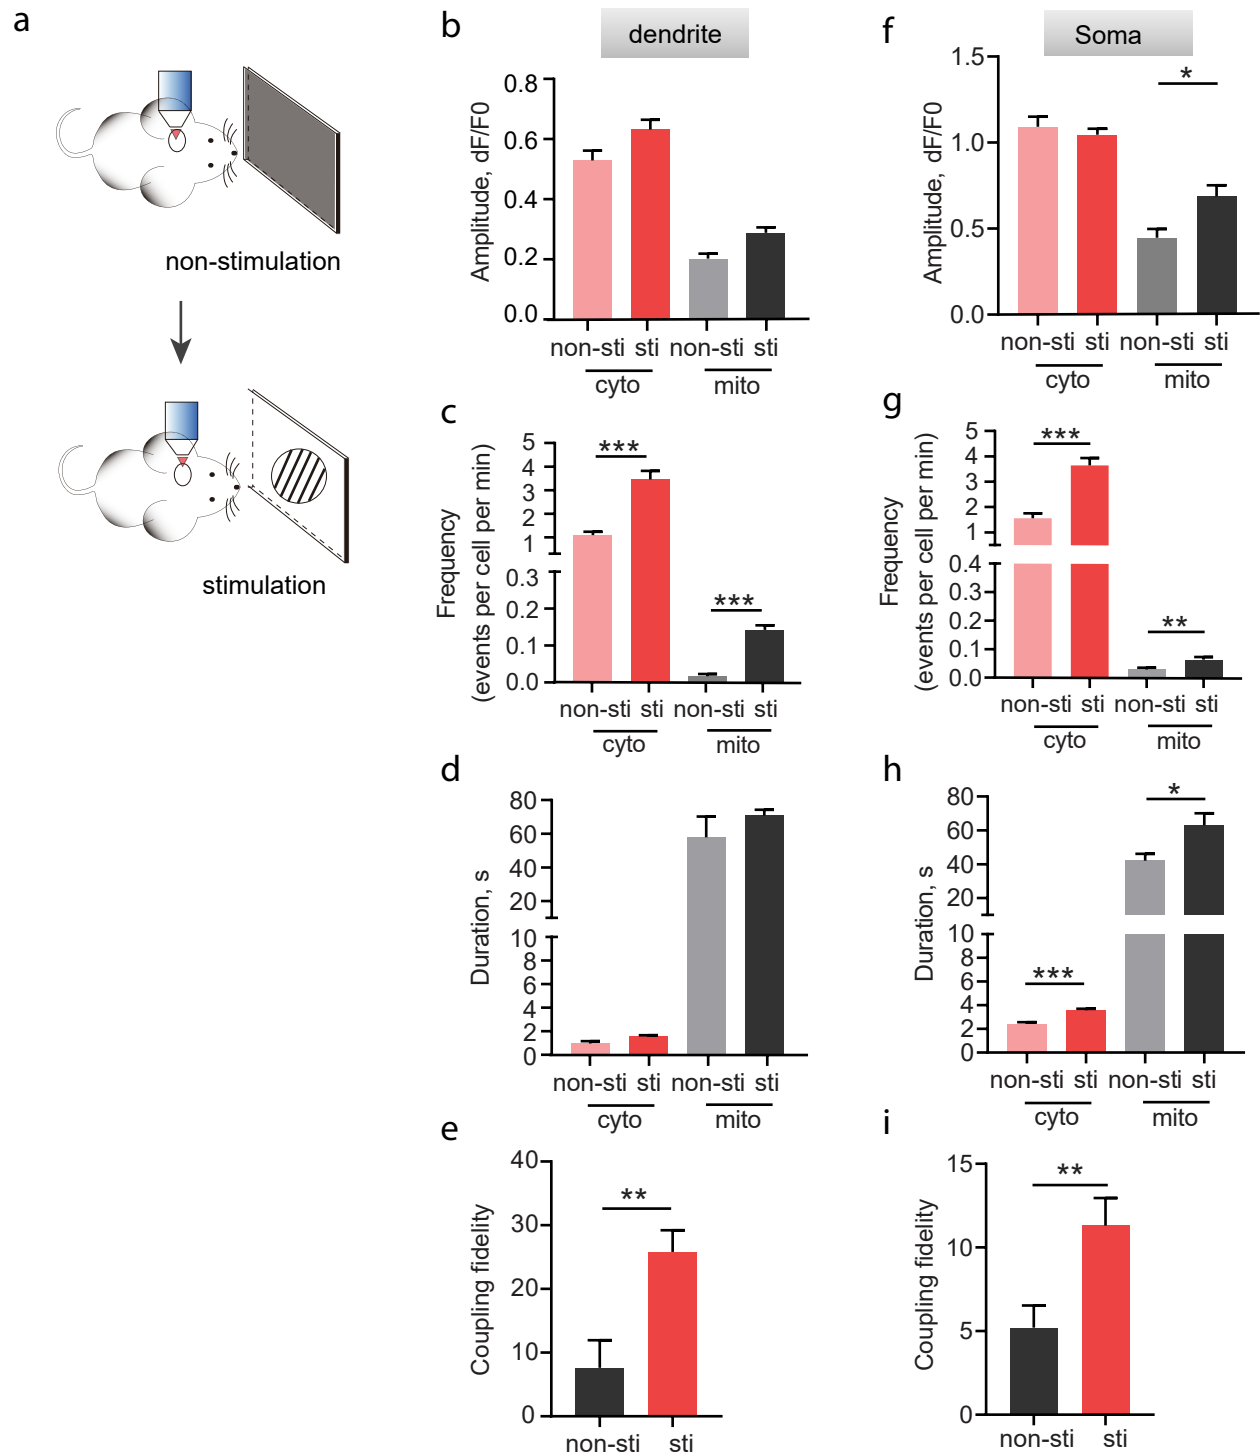

**Supplementary figure 6.** Visual stimulation enhanced  $[Ca^{2+}]_{mito}$ -to- $[Ca^{2+}]_{cyto}$  coupling in L2/3 neurons of primary visual cortex.

**a** Schematic of transcranial two-photon imaging in L2/3 neurons of the primary visual cortex in awake behaving mice with or without visual stimulation. **b-d** Amplitudes, frequencies and duration of  $[Ca^{2+}]_{cyto}$  and  $[Ca^{2+}]_{mito}$  transients in dendrites ( $n = 5-100$  from 8 mice). **h-g** Amplitudes, frequencies and duration of  $[Ca^{2+}]_{cyto}$  and  $[Ca^{2+}]_{mito}$  transients somas ( $n = 5-256$  from 8 mice) at rest and during treadmill running. **e and i**, Coupling fidelity before and after visual stimulation in dendrites (**e**,  $n = 26-35$  events from 8 mice) and somas (**i**,  $n = 57-58$  events from 8 mice). Data are presented as mean  $\pm$  SEM. \* $P < 0.05$ . \*\* $P < 0.01$ . \*\*\* $P < 0.0001$ , unpaired T test. Source data are provided as a Source Data file.

## Supplementary figure 7

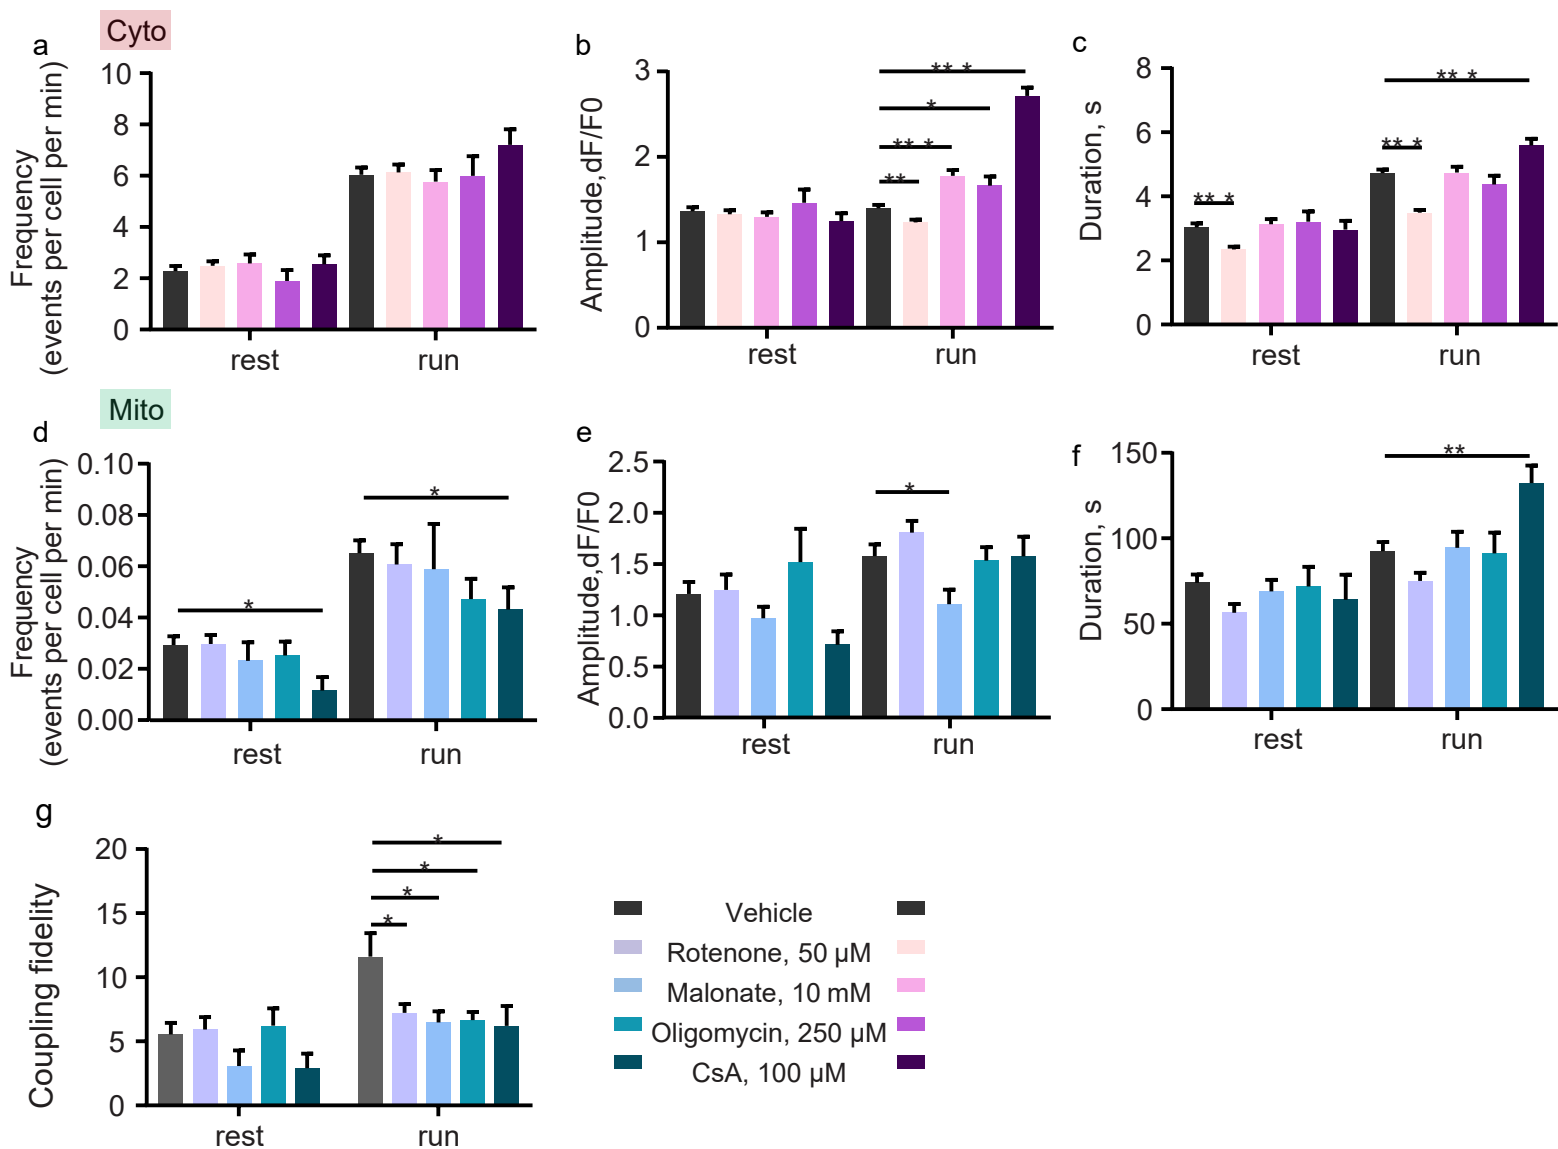

### Supplementary figure 7. Effects of ETC and MPTP inhibitors on $[\text{Ca}^{2+}]_{\text{mito-to-}}[\text{Ca}^{2+}]_{\text{cyto}}$ coupling

**a-f** Effects of ETC and MPTP inhibitors on somatic  $[\text{Ca}^{2+}]_{\text{cyto}}$  (**a-c**) and  $[\text{Ca}^{2+}]_{\text{mito}}$  (**d-f**) transient frequency, amplitude, duration in L2/3 M1 neurons.  $n = 4-6$  mice.  $1 \mu\text{l}$  of  $50 \mu\text{M}$  Rotenone,  $10 \mu\text{M}$  Malonate,  $250 \mu\text{M}$  Oligomycin,  $100 \mu\text{M}$  CsA in ACSF, or ACSF alone was injected locally in L2/3 and left to settle for 10 minutes before imaging. **g** All ETC and MPTP inhibitors used significantly decreased somatic  $[\text{Ca}^{2+}]_{\text{mito-to-}}[\text{Ca}^{2+}]_{\text{cyto}}$  coupling fidelity during running.  $*P < 0.05$ .  $**P < 0.01$ .  $***P < 0.0001$ , by one-way ANOVA and multiple comparisons. Source data are provided as a Source Data file.



## Supplementary figure 8

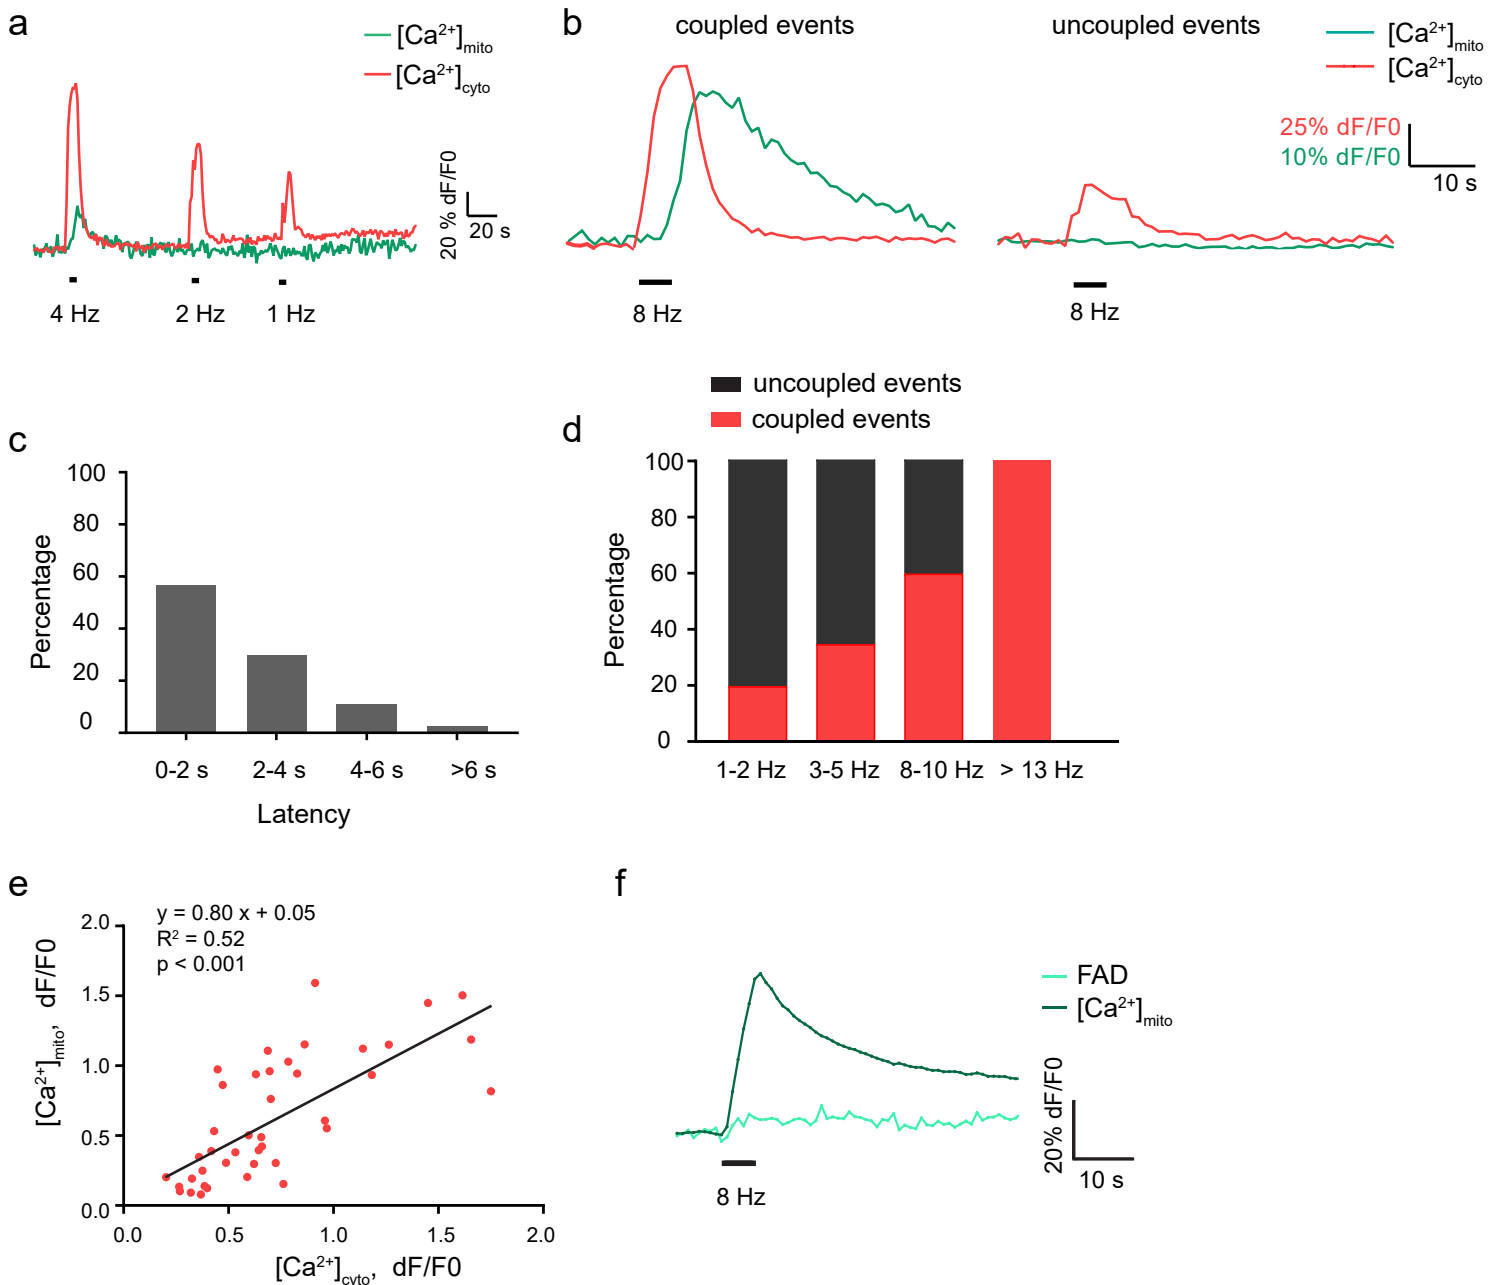

### Supplementary figure 8. $[Ca^{2+}]_{mito}$ -to- $[Ca^{2+}]_{cyto}$ coupling in cultured neonatal mouse cortical neurons.

**a** Representative example showing somatic  $[Ca^{2+}]_{mito}$ -to- $[Ca^{2+}]_{cyto}$  coupling and uncoupling in cultured neonatal mouse cortical neurons responding to field electrical stimulation. **b** Averaged traces of coupled (left panel) and uncoupled pairs of  $[Ca^{2+}]_{cyto}$  and  $[Ca^{2+}]_{mito}$  transients (right panel). 8 traces were used for each group. **c** Latency of somatic  $[Ca^{2+}]_{mito}$ -to- $[Ca^{2+}]_{cyto}$  coupling (n= 37 paired events in 15 cells). **d** Dependence of the coupling fidelity on electrical field stimulation frequency. (1-2 Hz, n= 26; 3-5 Hz, n= 38; 8-10 Hz, n= 32; >13 Hz, n= 13). **e** Correlation of amplitudes of  $[Ca^{2+}]_{cyto}$  and  $[Ca^{2+}]_{mito}$  transients for coupled events (n= 41 paired events in 18 cells). **f** Averaged traces of  $[Ca^{2+}]_{mito}$  transients and corresponding FAD autofluorescence. 17 traces were used for each group. Source data are provided as a Source Data file.
