# Supplementary material for: Brain activity regulates loose coupling between mitochondrial and cytosolic Ca2+ transients
Source: PubMed Central journal article supplement (PMC6872662; doi:10.1038/s41467-019-13142-0), 2019-11-21
Supplement: 41467_2019_13142_MOESM4_ESM.pdf [file 41467_2019_13142_MOESM4_ESM.pdf]

## Description of Additional Supplementary Files

File Name: Supplementary Movie 1

Description: In vivo two-photon imaging of  $[Ca^{2+}]_{mito}$  and  $[Ca^{2+}]_{cyto}$  transients in L1 dendrites. The region of image was at  $\sim 30 \mu m$  below the pia in primary motor cortex. The white arrow indicates a  $[Ca^{2+}]_{mito}$ -to- $[Ca^{2+}]_{cyto}$  coupling event.

File Name: Supplementary Movie 2

Description: In vivo two-photon imaging of  $[Ca^{2+}]_{mito}$  and  $[Ca^{2+}]_{cyto}$  transients in L2/3 somas. The region of image was at  $\sim 300 \mu m$  below the pia in primary motor cortex. The time window that mouse was running on the treadmill was labeled as "RUN" on upper left corner. The white arrows indicate representative  $[Ca^{2+}]_{mito}$ -to- $[Ca^{2+}]_{cyto}$  coupling events.

File Name: Supplementary Movie 3

Description: No pH change detected by mito-pHtomato either at rest or during running. The region of image was at  $\sim 30 \mu m$  below the pia in primary motor cortex
